# Supplementary material for: Construction of hierarchical multilayered nanomaterials derived from Co-MOFs supported by pyromellitic acid for advanced lithium storage performance
Source: Royal Society of Chemistry journal article supplement (doi:10.1039/d3nj02280c), 2023-01-01
Supplement: d3nj02280c1.pdf [file d3nj02280c1.pdf]

**Construction of hierachical multi-layered nanomaterials derived  
from Co-MOF supported by pyromellitic acid for advanced lithium  
storage performance**

Guohua Chen, Liying Wang\*, Yunfei Liu, Xin Miao, Zhenzhu Cao, Yongfeng Zhang

*School of Chemical Engineering, Inner Mongolia University of Technology; Inner Mongolia Key  
Laboratory of Efficient Recycle Utilization for Coal-Based Waste; National & Local Joint  
Engineering Research Center of High-Value Utilization of Coal-Based Solid Waste; Institute of  
Coal Conversion and Cyclic Economy, Hohhot, 010051, People's Republic of China*

Correspondence to: Liying Wang (E-mail: [wangliying7704@163.com](mailto:wangliying7704@163.com);  
[Wly2004@imut.edu.cn](mailto:Wly2004@imut.edu.cn))

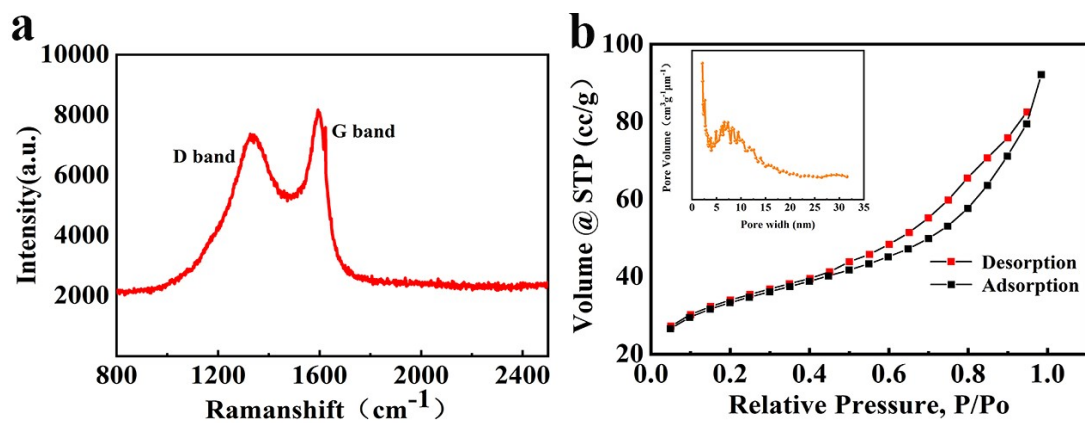

Fig.S1 (a) Raman spectra of D-1:5 , (b) N<sub>2</sub> adsorption-desorption isotherms of the D- 1:5.

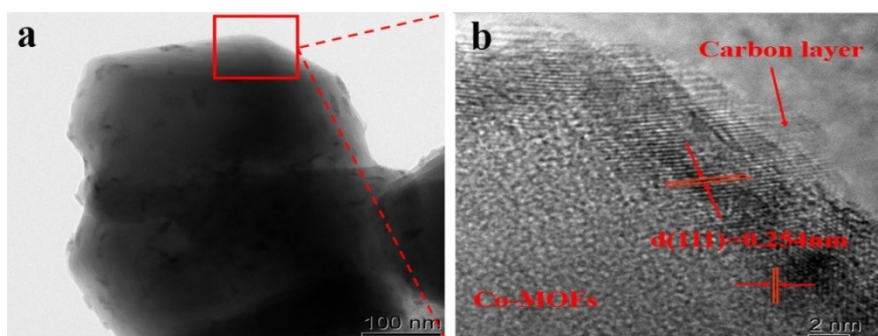

Fig. S2 (a) TEM and (b) HRTEM images of D-1:5.

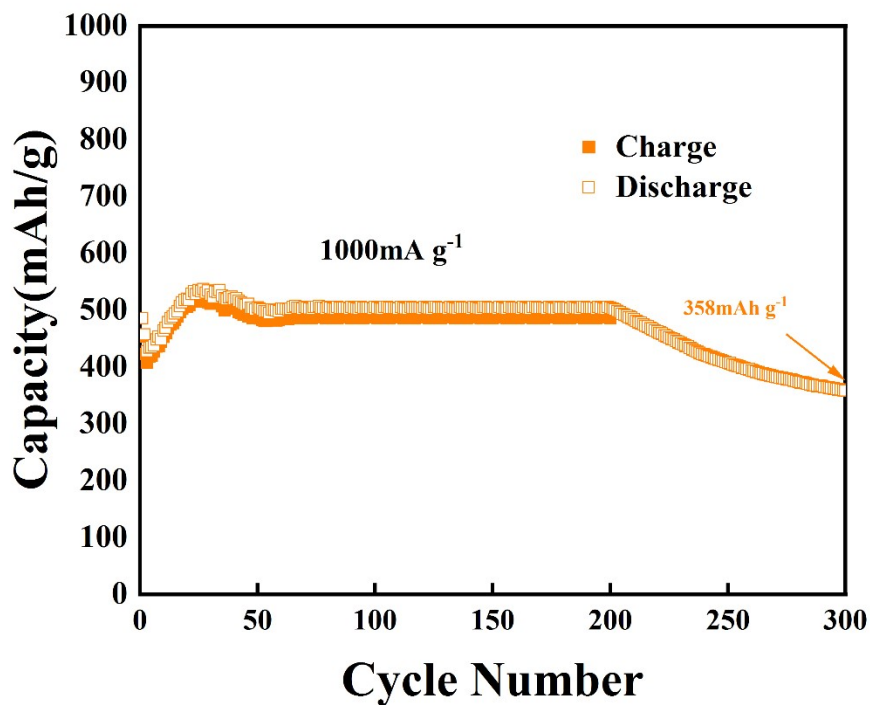

Fig. S3 long-term cycling performance at 1000 mA g<sup>-1</sup>

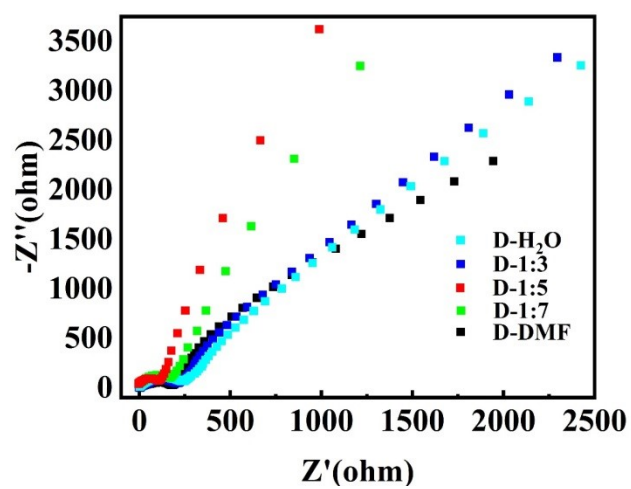

Fig. S4 Nyquist plots of the D-1:5 and its derivatives in the frequency range from 10 mHz to 100 kHz
